# Supplementary material for: Experimental and Density Functional Theory Studies on a Zinc(II) Coordination Polymer Constructed with 1,3,5-Benzenetricarboxylic Acid and the Derived Nanocomposites from Activated Carbon
Source: PubMed Central journal article supplement — ACS Omega. 2021 Oct 21;6(43):28967–82. doi: 10.1021/acsomega.1c04037 (PMC8567384; doi:10.1021/acsomega.1c04037), 2021-10-21
Supplement: ao1c04037_si_001.pdf [file ao1c04037_si_001.pdf]

## Experimental and Density Functional Theory Studies on Zinc(II) Coordination Polymer Constructed with 1, 3, 5-benzenetricarboxylic acid and the derived-nanocomposites from Activated Carbon

Chinyere A. Anyama <sup>a</sup>, Benedict I. Ita<sup>b</sup>, Ayi A. Ayi <sup>a\*</sup> Hitler Louis<sup>b</sup>, Emmanuel E. D. Okon<sup>a</sup>.

Joseph O. Ogar <sup>a, c</sup> and Charles O. Oseghale <sup>d</sup>

<sup>a</sup> *Inorganic Materials Research Laboratory, Department of Pure and Applied Chemistry, University of Calabar, 540242- Calabar, Nigeria.*

<sup>b</sup> *Computational and Bio-Simulation Research Group, University of Calabar, Nigeria*

<sup>c</sup> *School of Chemistry, Nottingham University, United Kingdom.*

<sup>d</sup> *Department of Chemistry, Federal University of Lafia, Nigeria.*

\*corresponding author: [ayiayi72@gmail.com](mailto:ayiayi72@gmail.com), [a.anyama@unical.edu.ng](mailto:a.anyama@unical.edu.ng)

Table S1. Crystal data and structure refinement for  $[\text{Zn}_3(\text{BTC})_2(\text{H}_2\text{O})_{12}]_n \cdot \text{ZnBTC}$ .

Table S2. Selected bond lengths for  $[\text{Zn}_3(\text{BTC})_2(\text{H}_2\text{O})_{12}]_n \cdot \text{ZnBTC}$ .

Table S3. Selected bond angles for  $[\text{Zn}_3(\text{BTC})_2(\text{H}_2\text{O})_{12}]_n \cdot \text{ZnBTC}$ .

Table S4. Fractional atomic coordinates ( $\times 10^4$ ) and equivalent isotropic displacement parameters ( $\text{\AA}^2 \times 10^3$ ) for  $[\text{Zn}_3(\text{BTC})_2(\text{H}_2\text{O})_{12}]_n \cdot \text{ZnBTC}$ .  $U_{eq}$  is defined as 1/3 of the trace of the orthogonalized  $U_{ij}$  tensor.

Table S5. Anisotropic displacement parameters ( $\text{\AA}^2 \times 10^3$ ) for  $[\text{Zn}_3(\text{BTC})_2(\text{H}_2\text{O})_{12}]_n \cdot \text{ZnBTC}$ . The anisotropic displacement factor exponent takes the form:  $2\pi^2[h^2a^{*2}u_1^2 + 2hka^*b^*u_1u_2 + \dots]$ .

Table S6. Torsion Angles for  $[\text{Zn}_3(\text{BTC})_2(\text{H}_2\text{O})_{12}]_n \cdot \text{ZnBTC}$ .

Table S7. Hydrogen atom coordinates ( $\text{\AA} \times 10^4$ ) and isotropic displacement parameters ( $\text{\AA}^2 \times 10^3$ ) for  $[\text{Zn}_3(\text{BTC})_2(\text{H}_2\text{O})_{12}]_n \cdot \text{ZnBTC}$ .

**Table S1 Crystal data and structure refinement for  $[\text{Zn}_3(\text{BTC})_2(\text{H}_2\text{O})_{12}]_n \cdot n\text{ZnBTC}$ .**

|                                                |                                                                  |
|------------------------------------------------|------------------------------------------------------------------|
| CCDC 2053471                                   |                                                                  |
| Empirical formula                              | $\text{C}_{12}\text{H}_{20}\text{O}_{16}\text{Zn}_2$             |
| Formula weight                                 | 551.02                                                           |
| Temperature/K                                  | 120.0(2)                                                         |
| Crystal system                                 | Monoclinic                                                       |
| Space group                                    | I2                                                               |
| a/Å                                            | 6.49670(10)                                                      |
| b/Å                                            | 12.92210(10)                                                     |
| c/Å                                            | 16.1403(2)                                                       |
| $\alpha/^\circ$                                | 90                                                               |
| $\beta/^\circ$                                 | 90.1460(10)                                                      |
| $\gamma/^\circ$                                | 90                                                               |
| Volume/Å <sup>3</sup>                          | 1354.99(3)                                                       |
| Z                                              | 3                                                                |
| $\rho_{\text{calc}}/\text{g}/\text{cm}^3$      | 2.026                                                            |
| $\mu/\text{mm}^{-1}$                           | 4.104                                                            |
| F(000)                                         | 840.0                                                            |
| Crystal size/mm <sup>3</sup>                   | 0.232 × 0.076 × 0.054                                            |
| Radiation                                      | Cu K $\alpha$ ( $\lambda = 1.54184$ )                            |
| 2 $\theta$ range for data collection/ $^\circ$ | 8.766 to 146.358                                                 |
| Index ranges                                   | -8 ≤ h ≤ 7, -15 ≤ k ≤ 16, -20 ≤ l ≤ 20                           |
| Reflections collected                          | 9748                                                             |
| Independent reflections                        | 2647 [ $R_{\text{int}} = 0.0163$ , $R_{\text{sigma}} = 0.0113$ ] |
| Data/restraints/parameters                     | 2647/3/218                                                       |
| Goodness-of-fit on F <sup>2</sup>              | 1.049                                                            |
| Final R indexes [ $I \geq 2\sigma(I)$ ]        | $R_1 = 0.0217$ , $wR_2 = 0.0561$                                 |
| Final R indexes [all data]                     | $R_1 = 0.0218$ , $wR_2 = 0.0561$                                 |
| Largest diff. peak/hole / e Å <sup>-3</sup>    | 0.29/-0.41                                                       |
| Flack parameter                                | 0.41(3)                                                          |

**Table S2 Bond Lengths for [Zn<sub>3</sub>(BTC)<sub>2</sub>(H<sub>2</sub>O)<sub>12</sub>]<sub>n</sub>- ZnBTC.**

| Atom | Atom            | Length/Å | Atom | Atom             | Length/Å |
|------|-----------------|----------|------|------------------|----------|
| Zn1  | O1              | 2.142(2) | Zn2  | O9 <sup>1</sup>  | 2.001(3) |
| Zn1  | O2              | 2.098(2) | Zn2  | O9               | 2.000(3) |
| Zn1  | O3              | 2.150(2) | Zn2  | C12              | 2.508(4) |
| Zn1  | O4              | 2.111(2) | C3   | C4               | 1.397(4) |
| Zn1  | O5              | 2.040(2) | C4   | C6               | 1.508(6) |
| Zn1  | O10             | 2.041(2) | O5   | C7               | 1.261(4) |
| C1   | C2              | 1.502(4) | C6   | O12              | 1.265(3) |
| C1   | O10             | 1.262(4) | C6   | O12 <sup>2</sup> | 1.265(3) |
| C1   | O11             | 1.261(4) | O6   | C7               | 1.264(4) |
| C2   | C3              | 1.391(4) | O7   | C12              | 1.271(3) |
| C2   | C5              | 1.394(4) | C7   | C8               | 1.512(4) |
| Zn2  | O7              | 2.160(2) | C8   | C9               | 1.388(4) |
| Zn2  | O7 <sup>1</sup> | 2.160(2) | C8   | C11              | 1.404(4) |
| Zn2  | O8 <sup>1</sup> | 2.121(2) | C9   | C10              | 1.392(4) |
| Zn2  | O8              | 2.121(2) | C10  | C12              | 1.481(6) |

<sup>1</sup>1-x, +y, 1-z; <sup>2</sup>1-x, +y, 2-z

**Table S3 Bond Angles for [Zn<sub>3</sub>(BTC)<sub>2</sub>(H<sub>2</sub>O)<sub>12</sub>]<sub>n</sub>- ZnBTC.**

| Atom            | Atom | Atom            | Angle/°    | Atom             | Atom | Atom            | Angle/°    |
|-----------------|------|-----------------|------------|------------------|------|-----------------|------------|
| O1              | Zn1  | O3              | 177.19(10) | O9               | Zn2  | O8              | 84.80(10)  |
| O2              | Zn1  | O1              | 90.17(9)   | O9 <sup>1</sup>  | Zn2  | O8              | 93.10(10)  |
| O2              | Zn1  | O3              | 87.03(9)   | O9 <sup>1</sup>  | Zn2  | O8 <sup>1</sup> | 84.80(10)  |
| O2              | Zn1  | O4              | 176.23(10) | O9               | Zn2  | O8 <sup>1</sup> | 93.10(10)  |
| O4              | Zn1  | O1              | 93.57(9)   | O9               | Zn2  | O9 <sup>1</sup> | 104.83(18) |
| O4              | Zn1  | O3              | 89.23(9)   | O9 <sup>1</sup>  | Zn2  | C12             | 127.58(9)  |
| O5              | Zn1  | O1              | 89.08(9)   | O9               | Zn2  | C12             | 127.58(9)  |
| O5              | Zn1  | O2              | 85.89(9)   | C2               | C3   | C4              | 120.0(3)   |
| O5              | Zn1  | O3              | 90.59(9)   | C3               | C4   | C3 <sup>2</sup> | 119.9(4)   |
| O5              | Zn1  | O4              | 93.64(9)   | C3               | C4   | C6              | 120.03(19) |
| O5              | Zn1  | O10             | 173.90(9)  | C3 <sup>2</sup>  | C4   | C6              | 120.03(19) |
| O10             | Zn1  | O1              | 85.98(9)   | C2               | C5   | C2 <sup>2</sup> | 120.5(4)   |
| O10             | Zn1  | O2              | 90.53(8)   | C7               | O5   | Zn1             | 128.3(2)   |
| O10             | Zn1  | O3              | 94.16(9)   | O12              | C6   | C4              | 118.7(2)   |
| O10             | Zn1  | O4              | 90.25(9)   | O12 <sup>2</sup> | C6   | C4              | 118.7(2)   |
| O10             | C1   | C2              | 116.7(3)   | O12 <sup>2</sup> | C6   | O12             | 122.7(4)   |
| O11             | C1   | C2              | 118.8(3)   | C12              | O7   | Zn2             | 90.10(19)  |
| O11             | C1   | O10             | 124.5(3)   | O5               | C7   | O6              | 124.9(3)   |
| C3              | C2   | C1              | 121.6(3)   | O5               | C7   | C8              | 117.1(3)   |
| C3              | C2   | C5              | 119.7(3)   | O6               | C7   | C8              | 118.0(3)   |
| C5              | C2   | C1              | 118.7(3)   | C9               | C8   | C7              | 119.0(3)   |
| O7 <sup>1</sup> | Zn2  | O7              | 60.89(12)  | C9               | C8   | C11             | 119.7(3)   |
| O7 <sup>1</sup> | Zn2  | C12             | 30.45(6)   | C11              | C8   | C7              | 121.3(3)   |
| O7              | Zn2  | C12             | 30.45(6)   | C8               | C9   | C10             | 120.3(3)   |
| O8              | Zn2  | O7              | 86.33(9)   | C1               | O10  | Zn1             | 128.64(19) |
| O8 <sup>1</sup> | Zn2  | O7 <sup>1</sup> | 86.33(9)   | C9 <sup>1</sup>  | C10  | C9              | 120.1(4)   |
| O8              | Zn2  | O7 <sup>1</sup> | 96.65(9)   | C9 <sup>1</sup>  | C10  | C12             | 119.9(2)   |
| O8 <sup>1</sup> | Zn2  | O7              | 96.65(9)   | C9               | C10  | C12             | 119.9(2)   |
| O8 <sup>1</sup> | Zn2  | O8              | 176.56(13) | C8 <sup>1</sup>  | C11  | C8              | 119.8(4)   |
| O8              | Zn2  | C12             | 91.72(6)   | O7               | C12  | Zn2             | 59.45(19)  |
| O8 <sup>1</sup> | Zn2  | C12             | 91.72(6)   | O7 <sup>1</sup>  | C12  | Zn2             | 59.45(19)  |
| O9              | Zn2  | O7 <sup>1</sup> | 97.98(11)  | O7               | C12  | O7 <sup>1</sup> | 118.9(4)   |
| O9 <sup>1</sup> | Zn2  | O7 <sup>1</sup> | 155.90(11) | O7 <sup>1</sup>  | C12  | C10             | 120.55(19) |
| O9              | Zn2  | O7              | 155.90(11) | O7               | C12  | C10             | 120.55(19) |
| O9 <sup>1</sup> | Zn2  | O7              | 97.98(11)  | C10              | C12  | Zn2             | 180.0      |

<sup>1</sup>1-x, +y, 1-z; <sup>2</sup>1-x, +y, 2-z

**Table S4 Fractional Atomic Coordinates ( $\times 10^4$ ) and Equivalent Isotropic Displacement Parameters ( $\text{\AA}^2 \times 10^3$ ) for  $[\text{Zn}_3(\text{BTC})_2(\text{H}_2\text{O})_{12}]_n \cdot n\text{ZnBTC}$ .  $U_{\text{eq}}$  is defined as 1/3 of of the trace of the orthogonalised  $U_{ij}$  tensor.**

| Atom | x         | y           | Z           | U(eq)     |
|------|-----------|-------------|-------------|-----------|
| Zn1  | 5296.2(6) | 6097.8(3)   | 7588.8(2)   | 8.84(12)  |
| O1   | 2328(3)   | 6759.4(18)  | 7354.8(14)  | 13.4(4)   |
| C1   | 5770(4)   | 8111(2)     | 8489.3(17)  | 9.0(5)    |
| C2   | 5351(4)   | 8720(2)     | 9264.0(18)  | 8.3(6)    |
| Zn2  | 5000      | -1031.0(4)  | 5000        | 10.59(14) |
| O2   | 6637(4)   | 7158.3(16)  | 6767.6(14)  | 10.8(4)   |
| C3   | 5350(4)   | 9796(3)     | 9264.1(19)  | 10.2(6)   |
| O3   | 8338(4)   | 5485.5(18)  | 7780.2(14)  | 15.8(4)   |
| C4   | 5000      | 10338(3)    | 10000       | 10.1(8)   |
| O4   | 4136(4)   | 4980.5(17)  | 8420.0(14)  | 12.0(4)   |
| C5   | 5000      | 8184(3)     | 10000       | 8.3(7)    |
| O5   | 4909(3)   | 5170.8(17)  | 6577.0(13)  | 10.7(4)   |
| C6   | 5000      | 11504(4)    | 10000       | 14.6(9)   |
| O6   | 3707(3)   | 3722.2(16)  | 7163.8(13)  | 12.3(4)   |
| O7   | 4553(3)   | 410.1(18)   | 5653.3(13)  | 11.5(4)   |
| C7   | 4403(4)   | 4229(2)     | 6555.6(18)  | 9.3(6)    |
| C8   | 4678(4)   | 3668(2)     | 5740.9(18)  | 9.4(6)    |
| O8   | 7943(4)   | -1080.3(18) | 5570.9(15)  | 15.7(4)   |
| C9   | 4651(5)   | 2594(2)     | 5733.8(18)  | 9.4(6)    |
| O9   | 6252(4)   | -1975(2)    | 4158.1(17)  | 24.4(6)   |
| O10  | 5521(4)   | 7144.4(16)  | 8531.9(13)  | 11.5(4)   |
| C10  | 5000      | 2056(3)     | 5000        | 9.5(8)    |
| C11  | 5000      | 4212(3)     | 5000        | 8.3(7)    |
| O11  | 6367(3)   | 8587.0(16)  | 7851.4(13)  | 12.3(4)   |
| O12  | 4929(4)   | 11973.7(18) | 10686.9(16) | 21.6(6)   |
| C12  | 5000      | 910(3)      | 5000        | 10.3(8)   |

**Table S5 Anisotropic Displacement Parameters ( $\text{\AA}^2 \times 10^3$ ) for  $[\text{Zn}_3(\text{BTC})_2(\text{H}_2\text{O})_{12}]_n \cdot n\text{ZnBTC}$ . The Anisotropic displacement factor exponent takes the form:  $2\pi^2[h^2a^{*2}U_{11}+2hka^*b^*U_{12}+\dots]$ .**

| Atom | $U_{11}$ | $U_{22}$ | $U_{33}$ | $U_{23}$  | $U_{13}$ | $U_{12}$ |
|------|----------|----------|----------|-----------|----------|----------|
| Zn1  | 12.5(2)  | 6.62(19) | 7.41(18) | -0.53(13) | 0.12(13) | 0.32(14) |
| O1   | 15.6(11) | 10.3(10) | 14.4(10) | -1.5(8)   | 0.0(8)   | 2.4(8)   |
| C1   | 7.3(12)  | 10.3(13) | 9.3(13)  | 0.4(11)   | -1.8(10) | -0.8(11) |
| C2   | 6.3(13)  | 8.9(14)  | 9.7(14)  | -1.4(10)  | 0.1(10)  | -0.2(9)  |
| Zn2  | 13.7(3)  | 7.5(3)   | 10.6(3)  | 0         | -0.1(2)  | 0        |
| O2   | 13.6(11) | 8.4(10)  | 10.3(10) | -1.2(7)   | 1.6(8)   | 0.3(8)   |
| C3   | 7.5(14)  | 10.9(14) | 12.1(15) | 2.2(11)   | 0.0(11)  | -0.1(11) |
| O3   | 22.6(11) | 12.2(11) | 12.5(10) | -3.0(9)   | -4.2(8)  | 6.4(9)   |
| C4   | 6.7(18)  | 6(2)     | 18(2)    | 0         | 2.8(15)  | 0        |
| O4   | 16.7(11) | 9.3(10)  | 10.2(10) | -1.7(8)   | 2.9(8)   | 0.4(8)   |
| C5   | 5.4(17)  | 6.7(18)  | 12.7(18) | 0         | -1.2(14) | 0        |
| O5   | 15.2(10) | 7.0(10)  | 9.9(10)  | -1.8(7)   | 0.3(8)   | -1.1(8)  |
| C6   | 12(2)    | 9(2)     | 23(2)    | 0         | 10.6(18) | 0        |
| O6   | 15.9(11) | 10.1(10) | 10.8(10) | -1.0(8)   | 3.1(8)   | -2.9(8)  |
| O7   | 15.8(10) | 9.1(10)  | 9.8(10)  | 1.1(8)    | 1.7(8)   | -0.3(8)  |
| C7   | 6.6(13)  | 10.8(14) | 10.6(13) | -0.6(11)  | -1.0(10) | 0.9(10)  |
| C8   | 6.7(13)  | 10.7(14) | 10.7(15) | -1.9(10)  | -1.2(11) | 0.0(10)  |
| O8   | 15.1(10) | 10.5(10) | 21.4(11) | -3.2(9)   | -5.1(9)  | -0.2(9)  |
| C9   | 8.4(14)  | 11.8(15) | 8.1(14)  | 1.5(10)   | 1.1(11)  | 0.3(10)  |
| O9   | 18.7(12) | 27.2(14) | 27.2(13) | -17.3(12) | -7.6(10) | 5.9(11)  |
| O10  | 17.5(12) | 7.0(10)  | 10.1(10) | -0.6(7)   | 0.5(8)   | -2.2(8)  |
| C10  | 6.1(19)  | 9(2)     | 13(2)    | 0         | -1.2(16) | 0        |
| C11  | 4.7(17)  | 8.4(18)  | 11.8(19) | 0         | -0.3(14) | 0        |
| O11  | 16.1(11) | 11.2(10) | 9.5(10)  | -1.3(8)   | 3.0(8)   | -2.6(8)  |
| O12  | 26.3(13) | 8.6(11)  | 30.1(14) | -5.5(10)  | 18.2(11) | -3.5(10) |
| C12  | 8.6(18)  | 12(2)    | 10.3(18) | 0         | -0.2(15) | 0        |

**Table S6 Torsion Angles for [Zn<sub>3</sub>(BTC)<sub>2</sub>(H<sub>2</sub>O)<sub>12</sub>]<sub>n</sub>, - ZnBTC.**

| A               | B  | C   | D                | Angle/°     | A               | B   | C   | D               | Angle/°     |
|-----------------|----|-----|------------------|-------------|-----------------|-----|-----|-----------------|-------------|
| Zn1             | O5 | C7  | O6               | 12.3(4)     | O6              | C7  | C8  | C9              | -15.5(4)    |
| Zn1             | O5 | C7  | C8               | -166.92(18) | O6              | C7  | C8  | C11             | 165.8(2)    |
| C1              | C2 | C3  | C4               | -178.6(2)   | C7              | C8  | C9  | C10             | -176.9(2)   |
| C1              | C2 | C5  | C2 <sup>1</sup>  | 178.6(3)    | C7              | C8  | C11 | C8 <sup>2</sup> | 177.7(3)    |
| C2              | C1 | O10 | Zn1              | 164.98(19)  | C8              | C9  | C10 | C9 <sup>2</sup> | -0.9(2)     |
| C2              | C3 | C4  | C3 <sup>1</sup>  | 0.0(2)      | C8              | C9  | C10 | C12             | 179.1(2)    |
| C2              | C3 | C4  | C6               | 180.0(2)    | C9              | C8  | C11 | C8 <sup>2</sup> | -0.9(2)     |
| Zn2             | O7 | C12 | O7 <sup>2</sup>  | 0.000(1)    | C9 <sup>2</sup> | C10 | C12 | O7              | -175.43(18) |
| Zn2             | O7 | C12 | C10              | 180.000(1)  | C9              | C10 | C12 | O7              | 4.57(18)    |
| C3              | C2 | C5  | C2 <sup>1</sup>  | 0.0(2)      | C9              | C10 | C12 | O7 <sup>2</sup> | -175.43(18) |
| C3              | C4 | C6  | O12 <sup>1</sup> | 8.46(19)    | C9 <sup>2</sup> | C10 | C12 | O7 <sup>2</sup> | 4.57(18)    |
| C3 <sup>1</sup> | C4 | C6  | O12              | 8.46(19)    | O10             | C1  | C2  | C3              | -172.7(3)   |
| C3 <sup>1</sup> | C4 | C6  | O12 <sup>1</sup> | -171.54(19) | O10             | C1  | C2  | C5              | 8.7(4)      |
| C3              | C4 | C6  | O12              | -171.54(19) | C11             | C8  | C9  | C10             | 1.8(4)      |
| C5              | C2 | C3  | C4               | 0.1(4)      | O11             | C1  | C2  | C3              | 8.3(4)      |
| O5              | C7 | C8  | C9               | 163.8(3)    | O11             | C1  | C2  | C5              | -170.3(2)   |
| O5              | C7 | C8  | C11              | -14.9(4)    | O11             | C1  | O10 | Zn1             | -16.1(4)    |

<sup>1</sup>1-x, +y, 2-z; <sup>2</sup>1-x, +y, 1-z

**Table S7 Hydrogen Atom Coordinates ( $\text{\AA} \times 10^4$ ) and Isotropic Displacement Parameters ( $\text{\AA}^2 \times 10^3$ ) for  $[\text{Zn}_3(\text{BTC})_2(\text{H}_2\text{O})_{12}]_n \cdot n\text{ZnBTC}$ .**

| Atom | x       | y        | z       | U(eq) |
|------|---------|----------|---------|-------|
| H1A  | 2351.8  | 7405.82  | 7470.28 | 20    |
| H1B  | 2067.11 | 6741.13  | 6835.18 | 20    |
| H2A  | 7745.51 | 6905.27  | 6572.99 | 16    |
| H2B  | 7024.65 | 7690.47  | 7036.08 | 16    |
| H3   | 5587.27 | 10163.83 | 8763.61 | 12    |
| H3A  | 8365.83 | 4846.22  | 7646.32 | 24    |
| H3B  | 8626.42 | 5488.52  | 8297.22 | 24    |
| H4A  | 3735.17 | 4448     | 8150.65 | 18    |
| H4B  | 3042.73 | 5208.7   | 8649.04 | 18    |
| H5   | 5000    | 7449.21  | 10000   | 10    |
| H8A  | 8572.57 | -617.93  | 5847.34 | 24    |
| H8B  | 8733.27 | -1603.6  | 5590.67 | 24    |
| H9   | 4393.91 | 2224.47  | 6231.65 | 11    |
| H9A  | 5539.36 | -2365.72 | 3846.62 | 37    |
| H9B  | 7373.56 | -2301.17 | 4230.52 | 37    |
| H11  | 5000.02 | 4947.4   | 5000    | 10    |
